# Supplementary material for: Highly efficient photocatalytic hydrogen generation by incorporating CdS into ZnCr-layered double hydroxide interlayer
Source: Royal Society of Chemistry journal article supplement (doi:10.1039/c4ra11757c), 2014-11-28
Supplement: c4ra11757c1.pdf [file c4ra11757c1.pdf]

## Highly efficient photocatalytic hydrogen generation by incorporating CdS into ZnCr-layered double hydroxide interlayer

Guohua Zhang, Bizhou Lin\*, Weiwei Yang, Shaofeng Jiang, Qianru Yao, Yilin Chen and Bifen Gao

### Electronic Supplementary Information

**Table S1** Parameters obtained from N<sub>2</sub> adsorption–desorption measurements

| sample       | surface area <sup>a</sup> (m <sup>2</sup> /g) | pore volume <sup>b</sup> (cm <sup>3</sup> /g) | average pore size <sup>c</sup> (nm) |
|--------------|-----------------------------------------------|-----------------------------------------------|-------------------------------------|
| ZnCr-LDH     | 33                                            | 0.11                                          | 3.8                                 |
| CdS          | 74                                            | 0.14                                          | 2.5                                 |
| CdS/ZnCr-LDH | 86                                            | 0.17                                          | 3.8                                 |

<sup>a</sup> BET specific surface area calculated from the linear part of BET plot.

<sup>b</sup> Total pore volume taken from the volume of N<sub>2</sub> adsorbed at  $p/p_0 = 0.98$ .

<sup>c</sup> Average pore radius was estimated from the Barrett–Joyner–Halenda formula.

**Table S2** Binding energies obtained from XPS measurements (eV)

| sample       | Zn 2p <sub>3/2</sub> | Zn 2p <sub>1/2</sub> | Cr 2p <sub>3/2</sub> | Cr 2p <sub>1/2</sub> | Cd 3d <sub>5/2</sub> | Cd 3d <sub>3/2</sub> | S 2p <sub>3/2</sub> |
|--------------|----------------------|----------------------|----------------------|----------------------|----------------------|----------------------|---------------------|
| ZnCr-LDH     | 1021.7               | 1044.8               | 577.3                | 587.1                | –                    | –                    | –                   |
| CdS          | –                    | –                    | –                    | –                    | 404.0                | 410.8                | 161.7               |
| CdS/ZnCr-LDH | 1021.4               | 1044.4               | 577.1                | 586.9                | 404.8                | 411.6                | 162.4               |

**Table S3** Photocatalytic performances of photocatalysts\*

| irradiation                          | UV-visible            |                       |                       | visible               |                       |                       |
|--------------------------------------|-----------------------|-----------------------|-----------------------|-----------------------|-----------------------|-----------------------|
|                                      | ZnCr-LDH              | CdS                   | CdS/ZnCr-LDH          | ZnCr-LDH              | CdS                   | CdS/ZnCr-LDH          |
| $R_i$ (quanta/sec)                   | $3.71 \times 10^{18}$ | $3.71 \times 10^{18}$ | $3.71 \times 10^{18}$ | $1.91 \times 10^{18}$ | $1.91 \times 10^{18}$ | $1.91 \times 10^{18}$ |
| $R_a$ (quanta/sec)                   | $2.16 \times 10^{16}$ | $2.65 \times 10^{17}$ | $1.50 \times 10^{17}$ | $1.04 \times 10^{16}$ | $7.95 \times 10^{16}$ | $3.19 \times 10^{16}$ |
| $R_{H_2}$ ( $\mu\text{mol h}^{-1}$ ) | 12.8                  | 96.6                  | 216.4                 | 0.7                   | 21.6                  | 37.4                  |
| QE (%)                               | 19.8                  | 12.1                  | 48.2                  | 2.4                   | 9.1                   | 42.6                  |

\* The calculation of quantum efficiency (QE) was conducted using the same procedure reported in literature (R. Asahi, T. Morikawa, T. Ohwaki, K. Aoki and Y. Taga, *Science*, 2001, **293**, 269–271).

$$QE = R_r/R_a = 2R_{H_2}/R_a,$$

where  $R_r$  is the reaction rate of photons involved in hydrogen generation,  $R_{H_2}$  is the H<sub>2</sub> evolution rate, and  $R_a$  is the absorption rate of incident photons.

Take CdS/ZnCr-LDH sample for example. Under the UV-visible light irradiation, the wavelength of UV-Visible light is from 300 to 2500 nm, and the light intensity is 113 mW/cm<sup>2</sup>. The irradiating area is 7.1 cm<sup>2</sup>. The rate of incident photons ( $R_i$ ) was determined to be  $3.71 \times 10^{18}$  quanta·sec<sup>-1</sup>. The absorption rate of incident photons ( $R_a$ ) was determined to  $1.50 \times 10^{17}$  quanta·sec<sup>-1</sup>, using the following equation:

$$R_a = \int_{300}^{2500} S \times \alpha \times \rho(\lambda) d\lambda$$

where  $S$  is the area of the sample,  $\alpha$  is the light absorption and  $\rho(\lambda)$  is the light intensity density at wavelength  $\lambda$ . The  $H_2$  evolution rate ( $R_{H_2}$ ) of CdS/ZnCr-LDH is  $214.6 \mu\text{mol}\cdot\text{h}^{-1}$  under UV-visible light irradiation. Therefore, the quantum efficiency (QE) can be estimated as

$$\text{QE} = 2 \times (214.6 \times 10^{-6} / 3.6 \times 10^3) \text{mol}\cdot\text{sec}^{-1} \times 6.02 \times 10^{23} \text{quanta}\cdot\text{mol}^{-1} / 1.50 \times 10^{17} \text{quanta}\cdot\text{sec}^{-1} \times 100\% = 48.2\%$$

Under the visible light irradiation, the wavelength of visible light is from 420 to 2500 nm, and the light intensity is  $67 \text{mW}/\text{cm}^2$ ,  $R_i = 1.91 \times 10^{18} \text{quanta}\cdot\text{sec}^{-1}$ . The absorption rate of incident photons ( $R_a$ ) for CdS/ZnCr-LDH was determined to  $3.19 \times 10^{16} \text{quanta}\cdot\text{sec}^{-1}$ . Based on  $R_{H_2} = 37.4 \mu\text{mol}\cdot\text{h}^{-1}$  under visible light irradiation. Hence,

$$\text{QE} = 2 \times (37.4 \times 10^{-6} / 3.6 \times 10^3) \text{mol}\cdot\text{sec}^{-1} \times 6.02 \times 10^{23} \text{quanta}\cdot\text{mol}^{-1} / 3.19 \times 10^{16} \text{quanta}\cdot\text{sec}^{-1} \times 100\% = 42.6\%$$

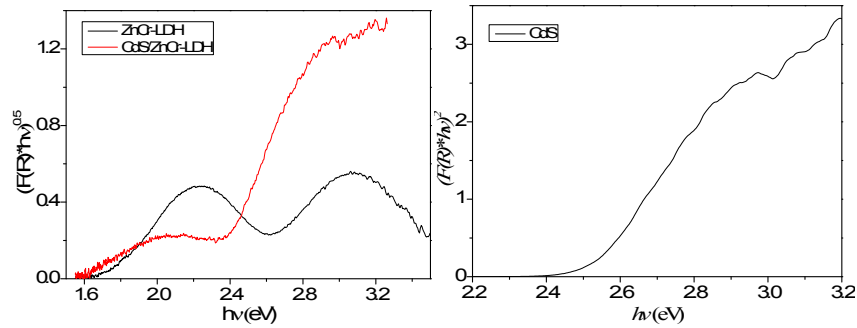

**Fig. S1.** The relationships between  $(F(R) \cdot hv)^\alpha$  and photon energy ( $h\nu$ ).

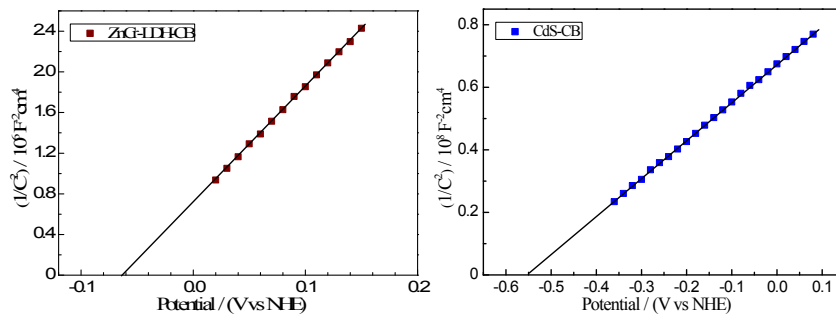

**Fig. S2.** Mott-Schottky plots of ZnCr-LDH and CdS.

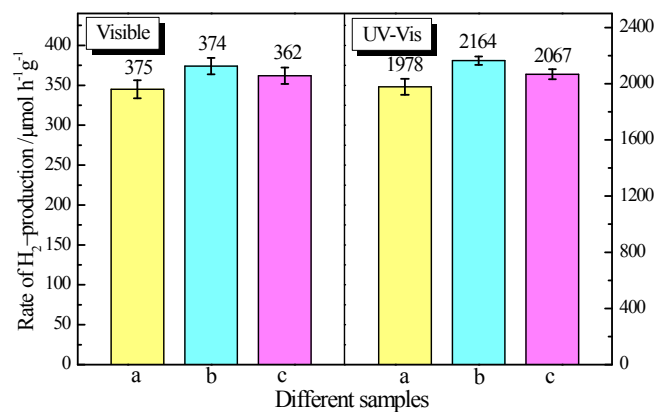

**Fig. S3.** Comparison of hydrogen evolution activity of the different CdS/ZnCr-LDH nanohybrids prepared from the molar ratio of CdS:ZnCr-LDH being 1:2 (a), 1:1 (b) and 2:1 (c).

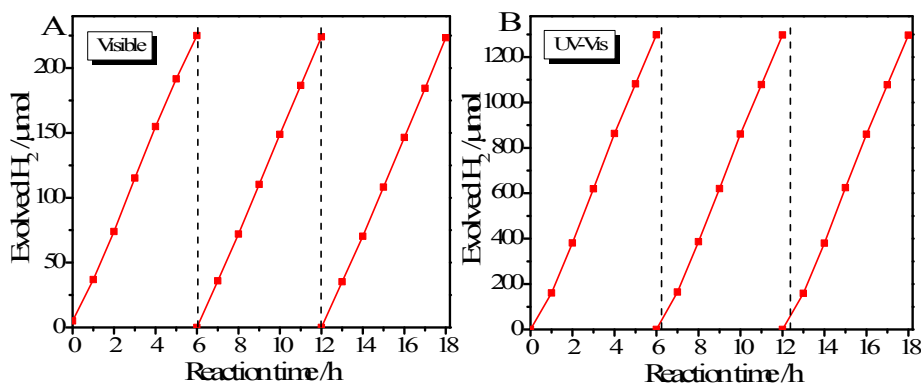

**Fig. S4.** Recyclability of photocatalytic hydrogen evolution over CdS/ZnCr-LDH under visible (A) and UV-visible (B) irradiation.
